**(Brief Report)**

**Title: Mental Bandwidth is Associated with HIV and Viral Suppression Among Low-Income Women in Philadelphia**

Aaron Richterman,<sup>\*1,2,3</sup> Nancy Aitcheson,<sup>1,2</sup> Celeste Durnwald,<sup>4</sup> Cara Curley,<sup>4</sup> William R. Short,<sup>1,4</sup> Mirabelle Jean Louis,<sup>5</sup> Florence Momplaisir,<sup>1,2</sup> Harsha Thirumurthy<sup>2,3</sup>

**Keywords:** Behavioral Economics, Pregnancy, HIV, Poverty, Mental Bandwidth

**Abbreviations:** ART, antiretroviral therapy; HIV, human immunodeficiency virus; IQR, interquartile range; KDDT, Kirby Delay Discounting Task; PWH, people with HIV; PVT, psychomotor vigilance task; RPM, Raven's progressive matrices; SD, standard deviation

**Word count: 2047**  
**Number of references: 37**  
**Number of tables: 1**  
**Number of figures: 0**

*\*Corresponding Author:* Aaron Richterman, MD, MPH; Hospital of the University of Pennsylvania, 3400 Spruce Street, Philadelphia, PA 19104; e-mail: [aaron.richterman@penntestmed.upenn.edu](mailto:aaron.richterman@penntestmed.upenn.edu) telephone: 2674417915; ORCID: 0000-0001-7920-7191

**Affiliations:**

<sup>1</sup> Division of Infectious Diseases, Department of Medicine, University of Pennsylvania, Philadelphia, Pennsylvania, USA

<sup>2</sup> Leonard Davis Institute of Health Economics, University of Pennsylvania, Philadelphia, Pennsylvania, USA

<sup>3</sup> Department of Medical Ethics and Health Policy, University of Pennsylvania, Philadelphia, Pennsylvania, USA

<sup>4</sup> Department of Obstetrics and Gynecology, University of Pennsylvania, Philadelphia, Pennsylvania, USA

<sup>5</sup> Bentley University, Boston, Massachusetts, USA

1 **Abstract**

2 Behavioral economics research suggests poverty may influence behavior by reducing  
3 mental bandwidth, increasing future discounting, and increasing risk aversion. It is  
4 plausible that these decision-making processes are further impaired in the context of  
5 HIV or pregnancy. In this cross-sectional study of 86 low-income women in  
6 Philadelphia, multivariable models showed that HIV was associated with decreased  
7 mental bandwidth (one of two measures) and lower risk aversion. Pregnancy was not  
8 associated with any decision-making factors. Viral suppression was associated with  
9 greater mental bandwidth (one of two measures), and antenatal care engagement with  
10 lower future discounting. Anti-poverty interventions may be particularly beneficial to  
11 improve health behaviors in the context of HIV.

## 12 **Introduction**

13 Health behaviors such as lack of adherence to antiretroviral therapy (ART) and  
14 inconsistent engagement in care remain some of the greatest barriers to ending HIV  
15 epidemics. This is particularly true for pregnant women with HIV, for whom postpartum  
16 clinic attendance, ART adherence, and postpartum viral suppression rates remain  
17 unacceptably low in high- and low-income settings.<sup>1-10</sup>

18 40% of people with HIV (PWH) in the US live below the poverty line,<sup>11</sup> and poverty is an  
19 important upstream contributor to poor ART adherence and engagement in care by  
20 PWH, particularly during pregnancy and in the years after giving birth.<sup>5,9</sup> Recent  
21 behavioral economics research suggests that poverty may affect individual behavior  
22 through psychological (in addition to economic) mechanisms.<sup>12-21</sup> This may occur  
23 through decreases in mental bandwidth (the mental resources available at a given time  
24 to make complex decisions), increases in future discounting (the tendency to  
25 undervalue future outcomes), and increases in risk aversion.<sup>15,16,19-24</sup>

26 While the association between poverty and these psychological decision-making  
27 processes has been recently established, it is plausible that these processes are even  
28 further impaired in the context of HIV or pregnancy. If this were the case, it would  
29 suggest that anti-poverty interventions could be particularly beneficial to improve health  
30 behaviors in these populations. To evaluate this possibility, we measured mental  
31 bandwidth, future discounting, and risk aversion among low-income women in  
32 Philadelphia, and examined their associations with HIV and pregnancy status.

## 33 **Methods**

34 We conducted a cross-sectional study of low-income pregnant and non-pregnant  
35 women with and without HIV receiving care at outpatient clinics in the University of  
36 Pennsylvania Health System. Eligibility criteria included (1) cisgender female, (2) age  
37 18-40 years, (3) Philadelphia resident, (4) household income <200% federal poverty  
38 level, (5) confirmed pregnancy by standard laboratory and ultrasound testing (pregnant  
39 participants), (6) documented HIV seropositive (participants with HIV), (7) able to  
40 provide informed consent. The study was approved by the University of Pennsylvania  
41 IRB. All participants provided written informed consent.

42 Participants completed a one-time survey assessing sociodemographics, income, food  
43 security,<sup>25</sup> health insurance, obstetrical history, self-reported ART adherence (among  
44 PWH), and whether a pregnancy was intended (pregnant participants). We conducted  
45 chart reviews to assess for most recent HIV viral load (last 3 months) and current  
46 gestational age. For pregnant participants, we conducted a follow-up chart review after  
47 delivery to assess antenatal care engagement (proportion of scheduled obstetrics clinic  
48 appointments that were attended) and gestational age at delivery.

49 We assessed mental bandwidth using two measures.<sup>14</sup> The Psychomotor Vigilance  
50 Task (PVT) assesses attentional vigilance by asking participants to press a button when  
51 a stimulus appears on a screen over a period of ten minutes and measuring reaction  
52 time and accuracy.<sup>26,27</sup> After standardizing reaction time, number of false starts  
53 (responding prior to the stimulus appearing), and number of minor lapses (correctly  
54 responding but with response time >500 milliseconds) such that each variable had a  
55 population mean of 0 and standard deviation (SD) of 1, we generated PVT scores to  
56 synthesize reaction time and accuracy as follows: reaction time + 0.5\*(minor lapses +

57 false starts).<sup>28</sup> Raven's Progressive Matrices (RPM) is a non-verbal estimate of fluid  
58 intelligence, or the ability to solve novel problems or adapt to new situations.<sup>29</sup> RPM  
59 presents participants with a series of ten figures with a missing portion of a pattern and  
60 asks them to select which of six options best completes the missing pattern, with the  
61 number of correct answers representing a participant's score.

62 We assessed future discounting using the Kirby Delay-Discounting Task (KDDT), a 27-  
63 item questionnaire that asks participants to hypothetically choose between smaller,  
64 immediate monetary rewards and larger, delayed awards.<sup>30,31</sup> The KDDT generates  
65 each participant's discounting constant ( $k$ ), with higher values indicating greater  
66 amounts of future discounting (i.e., greater impulsivity).<sup>32</sup>

67 We assessed risk-aversion using an ordered lottery selection method, asking  
68 participants hypothetical questions about whether they would prefer a 100% chance of  
69 receiving \$5, or a 50% chance of receiving \$10 and a 50% chance of receiving \$0, \$1,  
70 \$2, \$3, or \$4, to assess the threshold (if any) at which they would choose the higher-risk  
71 option.<sup>33,34</sup>

72 We used multivariable linear regression models to separately estimate associations  
73 between HIV and pregnancy (primary explanatory variables) with mental bandwidth  
74 (PVT, RPM), future discounting, and risk aversion (primary outcomes). Each of the  
75 outcomes was standardized to have a mean of 0 and standard deviation (SD) of 1, such  
76 that effect sizes were expressed in SDs of the outcome. Models controlled for age, race,  
77 ethnicity, educational attainment, income, food security, pregnancy (HIV models), and  
78 HIV (pregnancy models). These covariates were selected a priori as either known or

79 hypothesized confounders of the relationship between the decision-making processes  
80 and HIV or pregnancy.

81 In secondary analyses, we used similar multivariable models to estimate associations  
82 between the same decision-making factors and viral suppression (among PWH) and  
83 antenatal care engagement (among pregnant participants). Because of smaller sample  
84 sizes, these models adjusted only for age and either HIV or pregnancy.

85 We had a planned sample size of at least 70 participants (approximately half with HIV,  
86 and half pregnant) to provide at least 80% power to detect similar differences in mental  
87 bandwidth as seen in prior research demonstrating the effects of poverty alleviation on  
88 mental bandwidth (0.67 SDs).<sup>15</sup> The study was approved by the University of  
89 Pennsylvania Institutional Review Board. We performed statistical analysis using SAS  
90 Version 9.4 (SAS Institute; Cary, NC).

## 91 **Results**

92 We enrolled 86 participants with a median age of 28 years (IQR 25 to 32) between  
93 March 2022 and August 2023. There were 69 (80%) participants who identified as non-  
94 Hispanic Black, 6 (7%) as non-Hispanic White, 2 (3%) as non-Hispanic Asian, 2 (3%) as  
95 non-Hispanic and multiple races, and 7 (8%) as Hispanic. Sixty-seven participants  
96 (78%) had a single marital status, and 76 (88%) had completed high school.  
97 Participants had a median of 1 child (IQR 1 to 2). For annual household income, 25  
98 participants (29%) reported  $\leq$ \$10,000, 20 (23%) reported \$10,001-\$20,000, 28 (33%)  
99 reported \$20,001-\$40,000, 10 (12%) reported \$40,001-\$60,000, and 3 (3%) reported

100 \$60,001-\$80,000. Fifty-four participants (63%) were employed, 33 (38%) had low or  
101 very low food security, and 76 (88%) had Medicaid.

102 Thirty-five participants (41%) were living with HIV, and 36 (42%) were pregnant — 26  
103 (30%) were non-pregnant without HIV, 24 (28%) were non-pregnant with HIV, 25 (29%)  
104 were pregnant without HIV, and 11 (13%) were pregnant with HIV. PWH reported a  
105 median of one (IQR 0 to 3) missed dose of ART during the last month, with 16 (46%)  
106 having <95% adherence and 4 (11%) having <80% adherence. The most recent viral  
107 load was undetectable for 30 (86%) of the PWH. Among pregnant participants, 9 (25%)  
108 intended the current pregnancy, and the median gestational age at the time of the  
109 enrollment was 25 weeks (IQR 16 to 32). In follow-up chart review, pregnant  
110 participants had a median engagement in antenatal care (proportion of scheduled  
111 obstetrics visits attended) of 0.86 (IQR 0.71 to 1.00), and a median gestational age at  
112 delivery of 39 weeks (IQR 37 to 40).

113 Participants had a median number of correct answers on the RPM of 8 (IQR 7 to 9), and  
114 on the PVT they had a median reaction time of 414 milliseconds (IQR 375 to 484),  
115 median number of false starts of 1 (IQR 0 to 2), and a median number of minor lapses  
116 of 17 (IQR 8 to 38). Participants had a median log temporal discounting constant of -3.7  
117 (IQR -4.6 to -2.7). The median risk-aversion threshold was a 50% chance of \$4 and a  
118 50% chance of \$10 (IQR 50% chance of \$1 to no threshold [always choosing a 100%  
119 chance of \$5]).

120 After adjustment, HIV was associated with lower mental bandwidth on the PVT (-0.42  
121 SD difference, 95% CI -0.84 to -0.01), and lower risk-aversion (-1.16 SD difference,

122 95% CI -2.05 to -0.27) (Table 2). Pregnancy was not associated with any decision-  
123 making factors. Among PWH, viral suppression was associated with greater mental  
124 bandwidth on the PVT (1.12 SD difference, 95% CI 0.10 to 2.13). Among pregnant  
125 participants, antenatal care engagement was associated with lower future discounting (-  
126 1.57 SD difference, 95% CI -3.08 to -0.05).

## 127 **Discussion**

128 In this cross-sectional study of low-income women receiving health care in Philadelphia,  
129 we found that living with HIV was associated with significantly lower mental bandwidth  
130 (on one of two measures) and risk aversion, while pregnancy was not associated with  
131 any psychological decision-making factors. We also found that viral suppression was  
132 associated with greater mental bandwidth (on one of two measures), and antenatal care  
133 engagement was associated with lower future discounting. The differences were largely  
134 similar in magnitude to those seen in prior studies of poverty alleviation.<sup>15</sup> We  
135 hypothesize that we found associations between HIV (and viral suppression) and  
136 mental bandwidth when using the PVT but not RPM because of a ceiling effect resulting  
137 from high scores with little variability for the RPM, indicating that the RPM series needs  
138 to be more difficult for this population in future work. This is among the first studies to  
139 assess these decision-making factors among low-income PWH and pregnant women.

140 Our findings suggest that PWH living in poverty may be especially constrained in their  
141 ability to make decisions to promote long-term health (e.g. medication adherence), and  
142 that these constraints are associated with important health outcomes like viral  
143 suppression and engagement in care. Consequently, interventions that increase mental

144 bandwidth and decrease future discounting, such as poverty alleviation through cash  
145 transfers or housing support, may lead to improvements in health behaviors and health  
146 outcomes. While we did not find any specific differences associated with pregnancy, it  
147 remains possible that sub-groups of pregnant women – such as those with limited social  
148 support – experience greater losses in mental bandwidth. Studies with larger sample  
149 sizes of low-income pregnant women could further explore such associations. Our  
150 findings nonetheless remain relevant during the perinatal period since poverty often  
151 increases around the time of pregnancy.<sup>35</sup>

152 This study expands our understanding of poverty's impact on psychological decision-  
153 making processes into the context of HIV and HIV-related behaviors. The psychology  
154 literature points to a dual-process model of thinking and decision-making — System 1 is  
155 intuitive, and rapidly guides one's decision-making on a regular basis; System 2 is  
156 deliberative and considers longer-term consequences of each decision, but requires  
157 cognitive effort.<sup>36</sup> Mental bandwidth has been defined as the mental resources available  
158 at a given time to engage in System 2 thinking.<sup>14</sup> Recent behavioral economics  
159 research has shown that a state of economic scarcity (i.e., living in poverty) induces  
160 people to focus most of their attention towards immediate needs,<sup>19,23,24</sup> and that  
161 attention to these needs diminishes bandwidth.<sup>15,20</sup> Similarly, evidence suggests that  
162 poverty affects time preferences by increasing future discounting (defined as the  
163 tendency to undervalue future outcomes).<sup>21</sup> In contrast, alleviating scarcity through  
164 poverty alleviation has been shown to increase bandwidth and decrease  
165 discounting.<sup>16,22</sup> Whether poverty alleviation's effects on mental bandwidth and future  
166 discounting translates into changes in future-oriented health behaviors remains an open

167 question. While this growing economics literature has focused on the effects of poverty  
168 on these psychological decision-making factors, our study is among the first to evaluate  
169 associations between these factors and a specific context like HIV within which poverty  
170 is a highly important determinant of outcomes.

171 This study has several limitations. First, this study was cross-sectional, which precludes  
172 establishing causality for the identified associations. For example, living with HIV may  
173 lead to reductions in mental bandwidth, but it's also possible that people with lower  
174 mental bandwidth (because of poverty and other factors) may be more likely to acquire  
175 HIV, or that lower mental bandwidth is co-correlated with other HIV risk factors (such as  
176 substance use or housing insecurity). Regardless, the fact that PWH have lower mental  
177 bandwidth indicates that they may especially benefit from economic interventions that  
178 increase bandwidth and potentially improve health behaviors like ART adherence.<sup>37</sup>  
179 Second, as our findings come from a single center in a high-income country, they  
180 should be considered preliminary and replicated in other contexts.

## 181 **Conclusion**

182 In this cross-sectional study of low-income women living in Philadelphia, living with HIV  
183 was associated with lower mental bandwidth (on one of two measures) and risk  
184 aversion, whereas pregnancy was not associated with any psychological decision-  
185 making factors. Our findings suggest that PWH living in poverty may be especially  
186 constrained in their ability to make daily decisions to promote long-term health. We also  
187 found that these constraints are associated with important health outcomes like viral  
188 suppression and engagement in care. Consequently, interventions that increase mental

189 bandwidth and decrease future discounting, such as poverty alleviation, may lead to  
190 important improvements in outcomes among PWH.

## 191 **Author Roles**

192 *Author contributions:* Richterman had full access to all data in the study and takes  
193 responsibility for the integrity of the data and accuracy of the data analysis.

194 *Concept and design:* Richterman, Aitcheson, Momplaisir, Thirumurthy

195 *Acquisition, analysis, interpretation of data:* All authors

196 *Drafting of the manuscript:* Richterman

197 *Critical revision of the manuscript:* All authors

198 *Statistical analysis:* Richterman

## 199 **Competing interests**

200 The authors declare no conflicts of interest.

## 201 **Funding**

202 Penn Center for AIDS Research Center Developmental Pilot Award (P30AI045008) to  
203 AR, and National Institute of Mental Health of the National Institutes of Health  
204 (K23MH131464) to AR.

205 **Table 1.** Associations (with 95% CIs) between mental bandwidth, risk aversion, and future discounting with HIV, viral  
 206 suppression (among PWH), pregnancy, and antenatal care engagement (among pregnant participants). Effect measures  
 207 are generated using multivariable linear regression models and are standardized such that effect sizes are expressed  
 208 in standard deviations of the outcomes. HIV and pregnancy models control for age, race, ethnicity, educational  
 209 attainment, income, food security, pregnancy (HIV model), and HIV (pregnancy model). The viral suppression and  
 210 antenatal care engagement models control for age and HIV or pregnancy. Sample sizes are as follows: HIV and  
 211 Pregnancy models N=86; viral suppression model N=35; antenatal care model N=36.

|                                                             | HIV <sup>1</sup><br>(N=86) | Viral Suppression<br>(among PWH) <sup>2</sup><br>(N=35) | Pregnancy <sup>3</sup><br>(N=86) | Antenatal care<br>engagement (among<br>pregnant) <sup>4</sup><br>(N=36) |
|-------------------------------------------------------------|----------------------------|---------------------------------------------------------|----------------------------------|-------------------------------------------------------------------------|
| Mental<br>Bandwidth<br>(Psychomotor<br>Vigilance<br>Task)   | -0.42 (-0.84 to -0.01)     | 1.12 (0.10 to 2.13)                                     | 0.09 (-0.31 to 0.49)             | 0.89 (-0.68 to 2.46)                                                    |
| Mental<br>Bandwidth<br>(Raven's<br>Progressive<br>Matrices) | -0.37 (-0.78 to 0.06)      | -0.48 (-1.59 to 0.63)                                   | 0.07 (-0.34 to 0.47)             | -0.32 (-1.79 to 1.15)                                                   |
| Future<br>Discounting                                       | -0.07 (-0.51 to 0.37)      | -0.11 (-1.10 to 0.89)                                   | -0.03 (-0.45 to<br>0.39)         | -1.57 (-3.08 to -0.05)                                                  |
| Risk aversion                                               | -1.16 (-2.05 to -0.27)     | 0.08 (-1.72 to 1.88)                                    | -0.62 (-1.48 to<br>0.23)         | -0.16 (-3.20 to 2.88)                                                   |

212 <sup>1</sup> Models control for age, race, ethnicity, educational attainment, income, food security, and pregnancy.  
 213 <sup>2</sup> Models control for age and pregnancy.

214 <sup>3</sup> Models control for age, race, ethnicity, educational attainment, income, food security, and HIV status.  
 215 <sup>4</sup> Models control for age and HIV or pregnancy.

216 <sup>4</sup> Models control for age and HIV or pregnancy.

## References

1. Puttkammer N, Domercant JW, Adler M, et al. ART attrition and risk factors among Option B+ patients in Haiti: A retrospective cohort study. *PloS one*. 2017;12(3):e0173123.
2. Institut Haïtien de l'Enfance IHEH, lcf. *Haiti Enquête Mortalité, Morbidité et Utilisation des Services 2016-2017 - EMMUS-VI*. Pétion-Ville/Haïti: IHE/Haiti, ICF;2018.
3. Knettel BA, Cichowitz C, Ngocho JS, et al. Retention in HIV Care During Pregnancy and the Postpartum Period in the Option B+ Era: Systematic Review and Meta-Analysis of Studies in Africa. *Journal of acquired immune deficiency syndromes (1999)*. 2018;77(5):427-438.
4. Nachega JB, Uthman OA, Anderson J, et al. Adherence to antiretroviral therapy during and after pregnancy in low-income, middle-income, and high-income countries: a systematic review and meta-analysis. *AIDS (London, England)*. 2012;26(16):2039-2052.
5. Myer L, Phillips TK. Beyond "Option B+": Understanding Antiretroviral Therapy (ART) Adherence, Retention in Care and Engagement in ART Services Among Pregnant and Postpartum Women Initiating Therapy in Sub-Saharan Africa. *Journal of acquired immune deficiency syndromes (1999)*. 2017;75 Suppl 2:S115-s122.
6. Adams JW, Brady KA, Michael YL, Yehia BR, Momplaisir FM. Postpartum Engagement in HIV Care: An Important Predictor of Long-term Retention in Care and Viral Suppression. *Clinical infectious diseases : an official publication of the Infectious Diseases Society of America*. 2015;61(12):1880-1887.
7. Patel M, Tedaldi E, Armon C, et al. HIV RNA Suppression during and after Pregnancy among Women in the HIV Outpatient Study, 1996 to 2015. *J Int Assoc Provid AIDS Care*. 2018;17:2325957417752259.
8. Chen JS, Pence BW, Rahangdale L, et al. Postpartum HIV care continuum outcomes in the southeastern USA. *AIDS (London, England)*. 2019;33(4):637-644.
9. Momplaisir FM, Storm DS, Nkwihoreze H, Jayeola O, Jemmott JB. Improving postpartum retention in care for women living with HIV in the United States. *AIDS (London, England)*. 2018;32(2):133-142.
10. Philadelphia Department of Public Health. *HIV Surveillance Report 2019 - HIV in Philadelphia*. 2020.
11. Centers for Disease Control and Prevention. *Behavioral and Clinical Characteristics of Persons with Diagnosed HIV Infection — Medical Monitoring Project, United States, 2019 Cycle (June 2019-May 2020)*. *HIV Surveillance Special Report 28*. 2021.
12. Haushofer J, Fehr E. On the psychology of poverty. *Science (New York, NY)*. 2014;344(6186):862.
13. Weiser SD, Palar K, Hatcher AM, Young S, Frongillo EA, Laraia B. Food Insecurity and Health: A Conceptual Framework. In: Ivers LC, ed. *Food Insecurity and Public Health*. Boca Raton, Fla, USA: CRC Press; 2015:23-41.
14. Schilbach F, Schofield H, Mullainathan S. The Psychological Lives of the Poor. *Am Econ Rev*. 2016;106(5):435-440.
15. Mani A, Mullainathan S, Shafir E, Zhao J. Poverty Impedes Cognitive Function. *Science (New York, NY)*. 2013;341(6149):976.

16. Ong Q, Theseira W, Ng IYH. Reducing debt improves psychological functioning and changes decision-making in the poor. *Proceedings of the National Academy of Sciences*. 2019;116(15):7244.
17. Shah AK, Shafir E, Mullainathan S. Scarcity Frames Value. *Psychological Science*. 2015;26(4):402-412.
18. Shah AK, Zhao J, Mullainathan S, Shafir E. Money in the mental lives of the poor. *Social Cognition*. 2018;36(1):4-19.
19. Shah AK, Mullainathan S, Shafir E. Some consequences of having too little. *Science (New York, NY)*. 2012;338(6107):682-685.
20. Lichand G, Mani A. *Cognitive Droughts*. CSAE Working Paper Series. Centre for the Study of African Economies, University of Oxford;2020.
21. Bartoš V, Bauer M, Chytilová J, Lively I. Psychological Effects of Poverty on Time Preferences. *The Economic Journal*. 2021;131(638):2357-2382.
22. Ibrahim M, Chen Y, Pereira A, Musa T, Bathia D, Handa S. The Psychology of Poverty: A Replication Based on Zimbabwe's Harmonised Social Cash Transfer Programme. *Journal of African Economies*. 2023:ejad013.
23. Aarts H, Dijksterhuis A, De Vries P. On the psychology of drinking: being thirsty and perceptually ready. *Br J Psychol*. 2001;92(Pt 4):631-642.
24. Radel R, Clément-Guillot C. Evidence of motivational influences in early visual perception: hunger modulates conscious access. *Psychol Sci*. 2012;23(3):232-234.
25. Coleman-Jensen A, Rabbitt MP, Gregory CA, Singh A. *Statistical Supplement to Household Food Security in the United States in 2020, AP-091*. U.S. Department of Agriculture, Economic Research Service;2020.
26. Dean EB, Schilbach F, Schofield H. 2. Poverty and Cognitive Function The Economics of Poverty Traps. In: Barrett CB, Carter M, Chavas J-P, Carter MR, eds. *The Economics of Poverty Traps*. University of Chicago Press; 2019:57-118.
27. Dinges DF, Pack F, Williams K, et al. Cumulative sleepiness, mood disturbance, and psychomotor vigilance performance decrements during a week of sleep restricted to 4-5 hours per night. *Sleep*. 1997;20(4):267-277.
28. Schofield H. Behavioral Development Lab: Resources. <https://behavioraldevlab.org/resources/resource.html>. Published 2021. Accessed 11/4/2021.
29. Raven J. The Raven's progressive matrices: change and stability over culture and time. *Cogn Psychol*. 2000;41(1):1-48.
30. Kirby KN, Petry NM, Bickel WK. Heroin addicts have higher discount rates for delayed rewards than non-drug-using controls. *J Exp Psychol Gen*. 1999;128(1):78-87.
31. Lawyer SR, Schoepflin F, Green R, Jenks C. Discounting of hypothetical and potentially real outcomes in nicotine-dependent and nondependent samples. *Exp Clin Psychopharmacol*. 2011;19(4):263-274.
32. Kaplan BA, Amlung M, Reed DD, Jarmolowicz DP, Mckerchar TL, Lemley SM. Automating Scoring of Delay Discounting for the 21- and 27-Item Monetary Choice Questionnaires. *The Behavior Analyst*. 2016;39(2):293-304.

33. Chuang Y, Schechter L. Stability of experimental and survey measures of risk, time, and social preferences: A review and some new results. *Journal of Development Economics*. 2015;117:151-170.
34. Binswanger HP. Attitudes toward Risk: Experimental Measurement in Rural India. *American Journal of Agricultural Economics*. 1980;62(3):395-407.
35. Stanczyk AB. The Dynamics of U.S. Household Economic Circumstances Around a Birth. *Demography*. 2020;57(4):1271-1296.
36. Kahneman D, Frederick S. Representativeness Revisited: Attribute Substitution in Intuitive Judgment. In: Gilovich T, Griffin D, Kahneman D, eds. *Heuristics and Biases: The Psychology of Intuitive Judgment*. Cambridge, UK: Cambridge University Press; 2002:49-81.
37. Richterman A, Thirumurthy H. The effects of cash transfer programmes on HIV-related outcomes in 42 countries from 1996 to 2019. *Nature Human Behaviour*. 2022.
